# Supplementary material for: Evaluation of Selective γ-Secretase Inhibitor PF-03084014 for Its Antitumor Efficacy and Gastrointestinal Safety to Guide Optimal Clinical Trial Design
Source: Oxford University Press journal article supplement (doi:10.1158/1535-7163.mct-10-0034), 2010-06-01
Supplement: 15357163mct100034-sup-supplementary_table_2.xls [file 15357163mct100034-sup-supplementary_table_2.xls]

## Sheet: Sheet1
Supplementary Table 2 PF-03084014 inhibits T-ALL cell growth
Cell line	Notch1 mutation status	NICD levels	IC50 (nM)*	% Inh.
HPB-ALL	Yes	+++	95.65	0.8
DND-41	Yes	+++	62.4	0.7
TALL-1	No	-	53.95	0.66
ALL-SIL		ND**	23	0.27
Sup-T1	Translocation	+++	30.65	0.6
Jurkat	No	+++	No activity	No activity
*Average value from at least two independent experiments
** Not determined

## Sheet: Sheet1 (2)
	Table 1 PF-03084014 potencies on cell growth inhibition
	Cell line	Notch1 mutation status*		Average IC50 (nM)**		Supplementary Table 1 PF-03084014 inhibits T-ALL cell growth
		HD domain	PEST domain			Cell line	Notch1 mutation status	NICD levels	IC50 (nM)*
	HPB-ALL	Heterozygous mutation 1575 L®P	Heterozygous insertion 2444	95.65		HPB-ALL	Yes	+++	95.65
	DND41	Heterozygous mutation 1594 L®P	Heterozygous insertion 2442	62.4		DND41	Yes	+++	62.4
	TALL1	WT	WT	53.95		TALL1	No	-	53.95
	SupT1	Truncated mutation lacking ECD	Not known	30.65		SupT1	Translocation	+++	30.65
	Jurkat	WT	WT	No activity		Jurkat	No	+++	No activity
						*Average value from at least two independent experiments
	*details see O'Neil et al., 2007
	** N=2
	ECD: extracellular domain
	WT: wild type
	Jurkat: acute T cell leukemia
